# Supplementary material
Source: publisher site journal article supplement (https://www.dovepress.com/article/385921)

**Table S1:Combination Therapy with PD-1 Inhibitors**

| **Combination therapy** | **N=73** |
| --- | --- |
| Sorafenib | 2 |
| lenvatinib | 15 |
| Apatinib | 16 |
| HAIC | 18 |
| TACE | 15 |

Abbreviations：TACE, transcatheter arterial chemoembolization; HAIC, hepatic infusion chemotherapy

**Supplemental Figure 1**: Schematic of the method used to determine the optimal cutoff points of (A) CRP, (B) PLR, (C) NLR, (D) LCR, (E) LMR, (F) SII, (G) CAR, and (H) PNI using R version for survival prediction


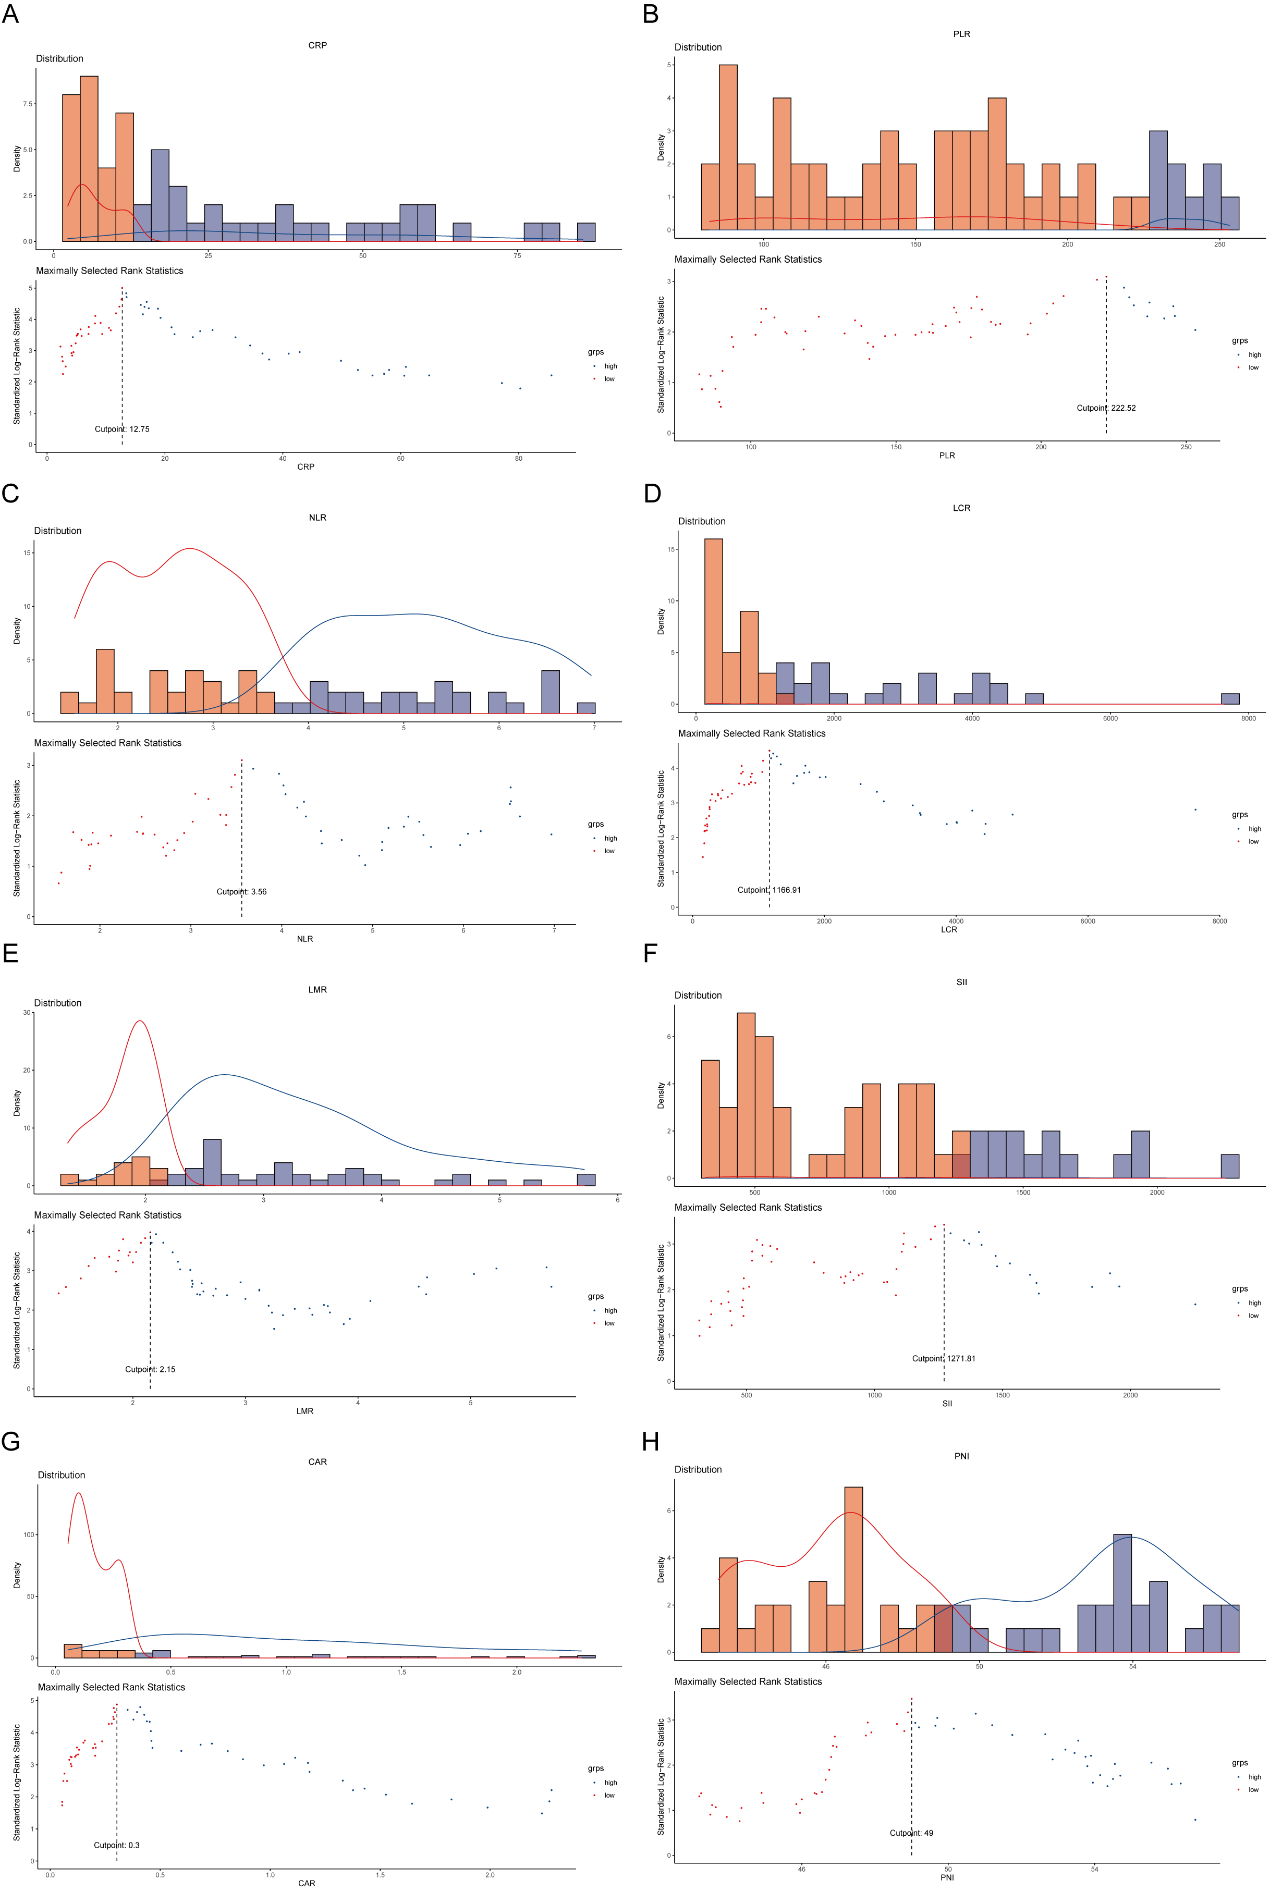


**Supplemental Figure 2**: Time-dependent receiver operating characteristic (ROC) curves for survival prediction of inflammation-based scores at (A) 6 months, (B) 12 months, (C) 18 months, and (D) 24 months in ICC patients after PD-1 inhibitors therapy


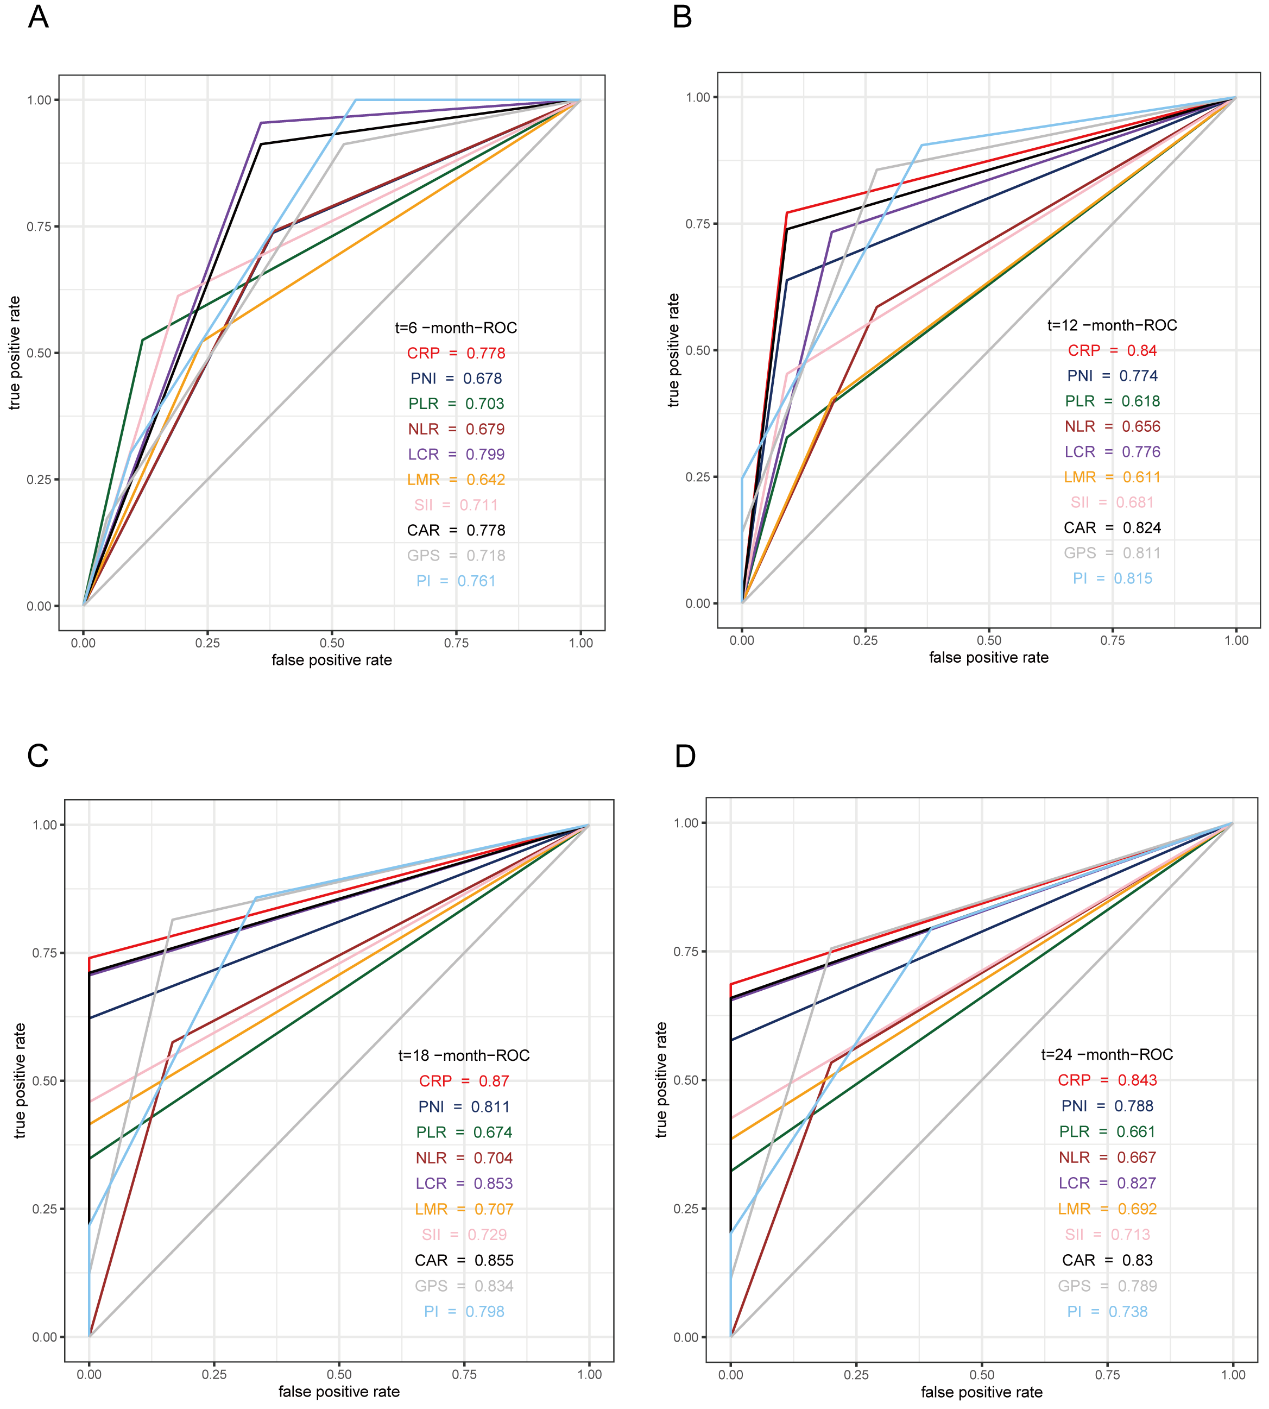


**Supplemental Figure 3**: Kaplan-Meier survival curves of patients stratified according to the presence of lymph node metastasis and TNM stage. (A) lymph node metastasis=0,

(B) lymph node metastasis=1, (C) TNM stage=0,(D) TNM stage=1
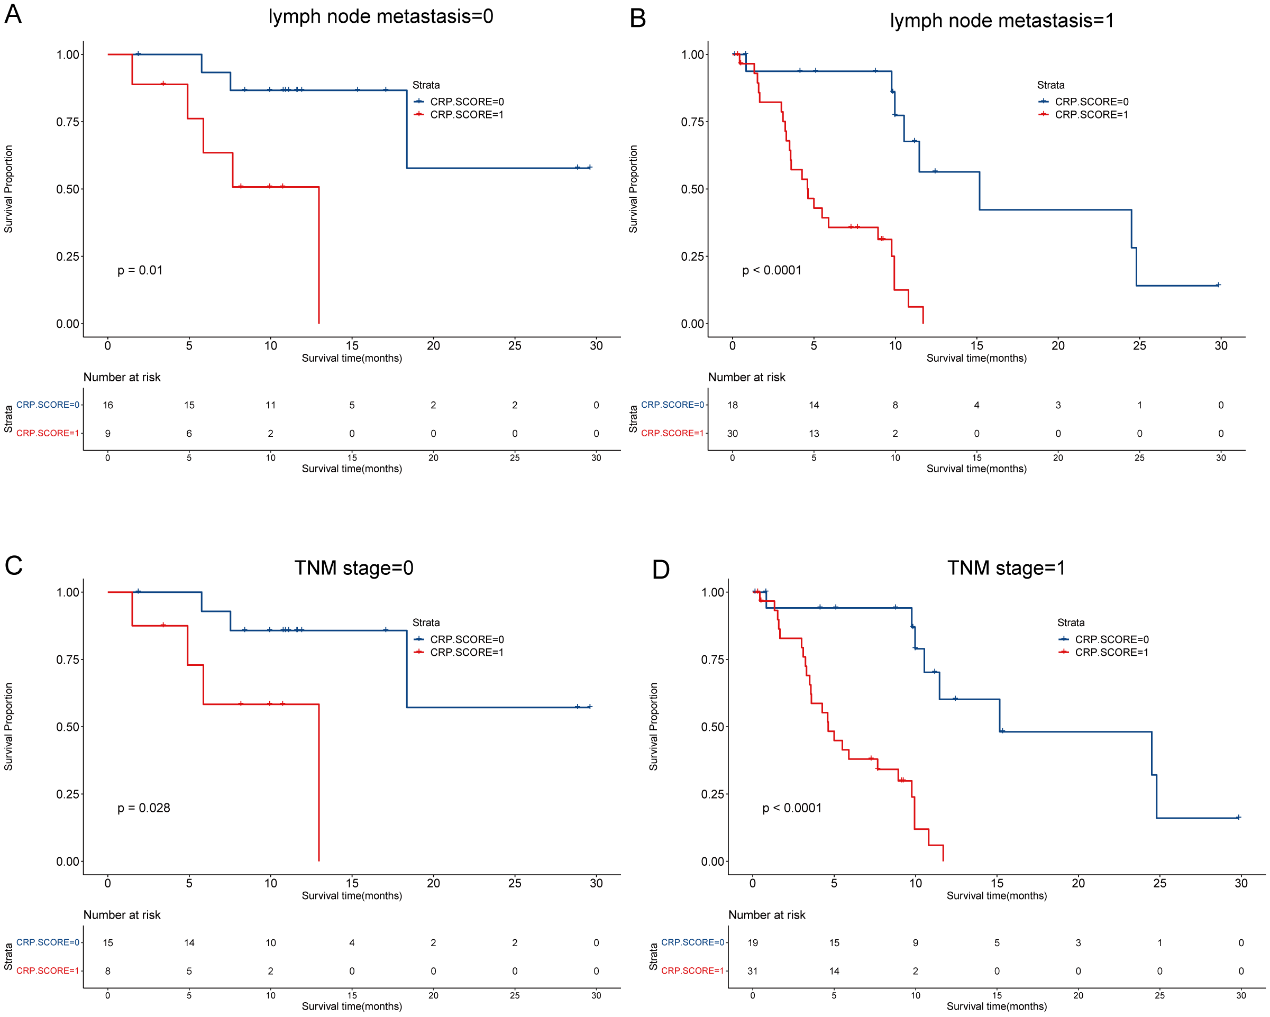

Supplement: Supplementary file 1 [file get_supplementary_file.php]
